# Supplementary material for: Band convergence in the non-cubic chalcopyrite compounds Cu2MGeSe4
Source: Royal Society of Chemistry journal article supplement (doi:10.1039/c4tc02218a), 2014-10-27
Supplement: c4tc02218a1.pdf [file c4tc02218a1.pdf]

## Supporting Information - Band convergence in the non-cubic chalcopyrite compounds $\text{Cu}_2M\text{GeSe}_4$ <sup>†</sup>

Wolfgang G. Zeier,<sup>\*a</sup> Hong Zhu,<sup>b</sup> Zachary M. Gibbs,<sup>a</sup> Gerbrand Ceder,<sup>b</sup> Wolfgang Tremel,<sup>c</sup> and G. Jeffrey Snyder<sup>a</sup>

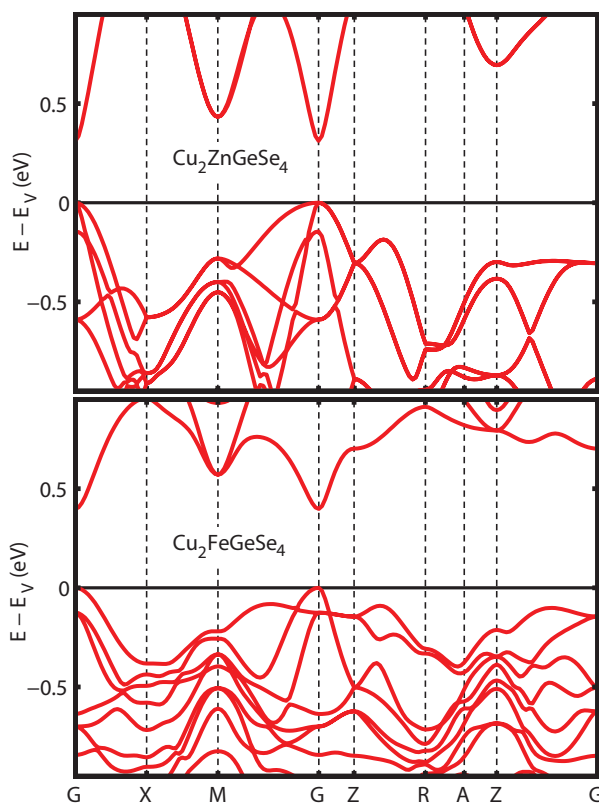

**Fig. 1** Calculated band structures of stannite-type  $\text{Cu}_2\text{ZnGeSe}_4$  (top) and kesterite-type  $\text{Cu}_2\text{FeGeSe}_4$  (bottom), showing the different configurations at the Gamma-point (G).

<sup>a</sup>Department of Material Science and Applied Physics, California Institute of Technology, 1200 E California Blvd, Pasadena CA 99125, USA. E-mail: zeier@caltech.edu

<sup>b</sup>Department of Materials Science and Engineering, Massachusetts Institute of Technology, 77 Massachusetts Avenue, Cambridge, MA 02139, USA

<sup>c</sup>Institut für Anorganische und Analytische Chemie, Johannes Gutenberg-University Mainz, Duesbergweg 10-14, 55099 Mainz, Germany
